# Supplementary material for: Size-dependent interaction of plasma with anatase TiO2 nanoparticles
Source: Royal Society of Chemistry journal article supplement (doi:10.1039/d0cp02452j), 2020-01-01
Supplement: d0cp02452j1.pdf [file d0cp02452j1.pdf]

## Electronic Supplementary Information (ESI)

### **Size-dependent interaction of plasma with anatase TiO<sub>2</sub> nanoparticles**

Saeid Asgharizadeh<sup>1\*</sup>, Sirous Khorram<sup>1</sup>, Masoud Lazemi<sup>1</sup>, Alireza Hosseinzadeh<sup>1</sup>, and Marc Malfois<sup>2</sup>

<sup>1</sup>Faculty of Physics, University of Tabriz, Tabriz 51666 16471, Iran.

<sup>2</sup>NCD – BL11, ALBA Synchrotron Light Source, Cerdanyola del Vallés, 08290, Barcelona, Spain.

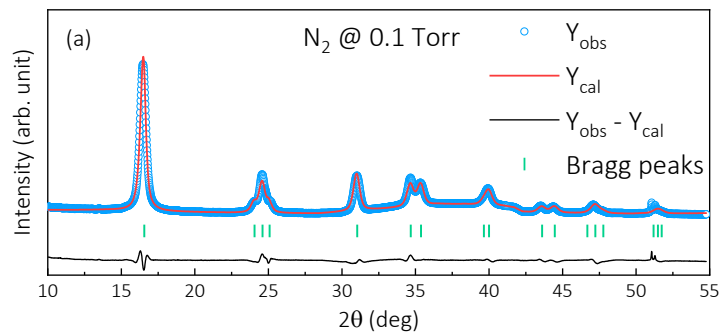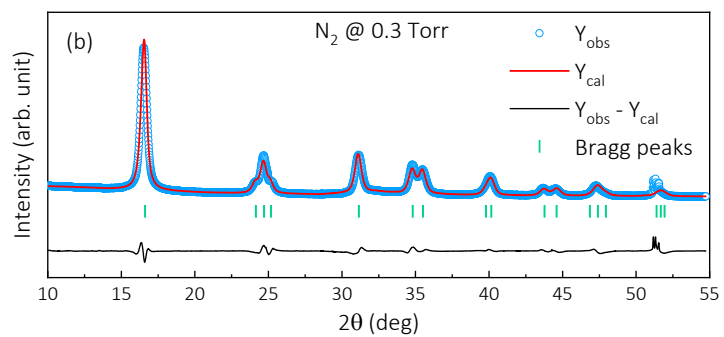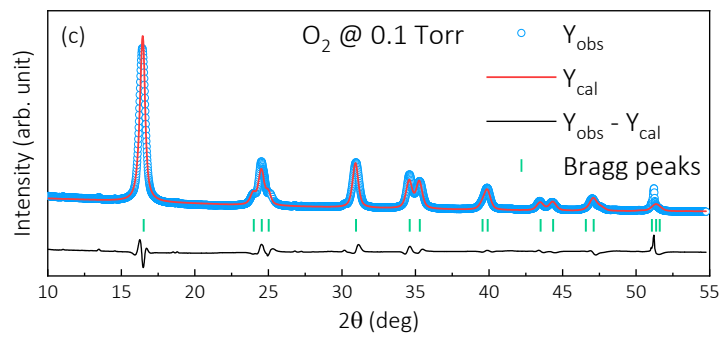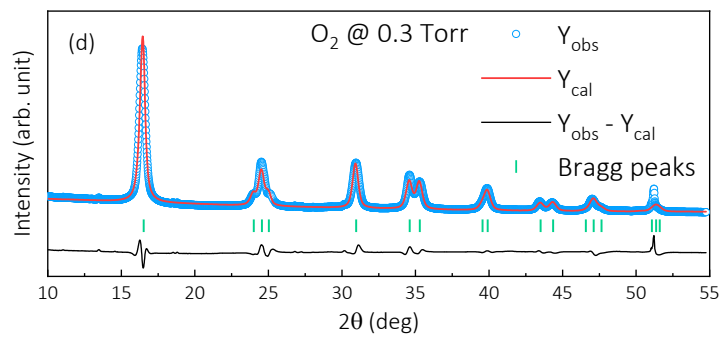

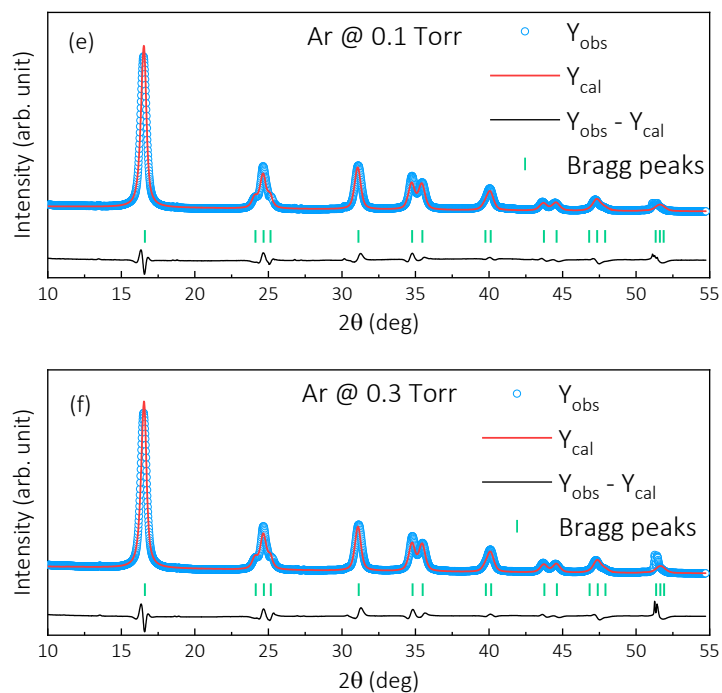

**Fig. S1.** (a) – (f) Rietveld refinements of the WAXS data of the treated samples with 0.1 and 0.3 Torr gas pressures of N<sub>2</sub>, O<sub>2</sub>, and Ar.

**Table 1S.** Unit cell parameters and the Rietveld refinement parameters of the treated samples with 0.1 and 0.3 Torr gas pressures of N<sub>2</sub>, O<sub>2</sub>, and Ar.

|                  | N <sub>2</sub> @ 0.1 | N <sub>2</sub> @ 0.3 | O <sub>2</sub> @ 0.1 | O <sub>2</sub> @ 0.3 | Ar @ 0.1 | Ar @ 0.3 |
|------------------|----------------------|----------------------|----------------------|----------------------|----------|----------|
| a (Å)            | 3.836                | 3.822                | 3.845                | 3.826                | 3.826    | 3.824    |
| c (Å)            | 9.634                | 9.599                | 9.653                | 9.609                | 9.609    | 9.601    |
| R <sub>p</sub>   | 2.96                 | 2.60                 | 2.73                 | 2.68                 | 2.62     | 2.51     |
| R <sub>wp</sub>  | 11.45                | 11.67                | 11.51                | 11.58                | 11.35    | 11.71    |
| R <sub>exp</sub> | 9.94                 | 9.71                 | 9.23                 | 9.29                 | 9.18     | 9.49     |

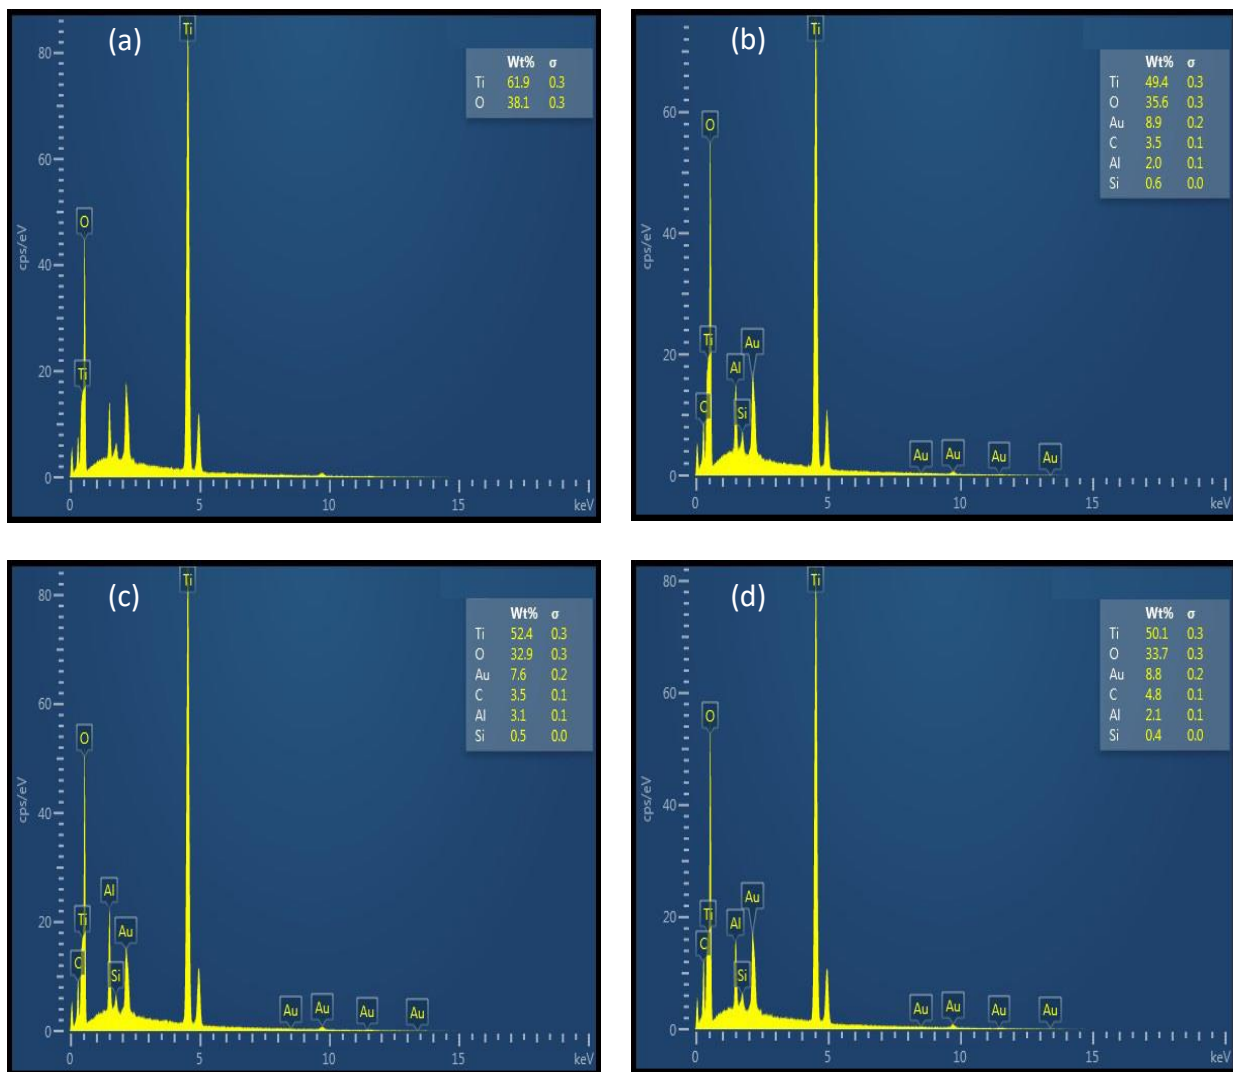

**Fig. S2.** EDX pattern of the pristine sample (a) and post-treated samples with Ar plasma (b) 0.1 Torr, (c) 0.3 Torr and (d) 0.6 Torr. Au contamination is due to the coating of the samples with Au to minimize charging effects on the SEM image. The presence of the other organic contaminations in the EDX spectrum is originated in the use of adhesives to keep samples on the holders.

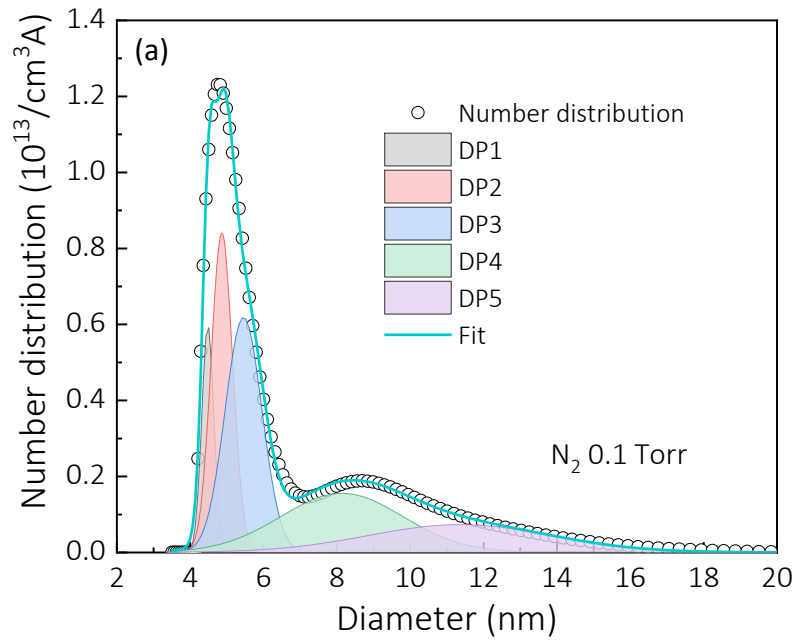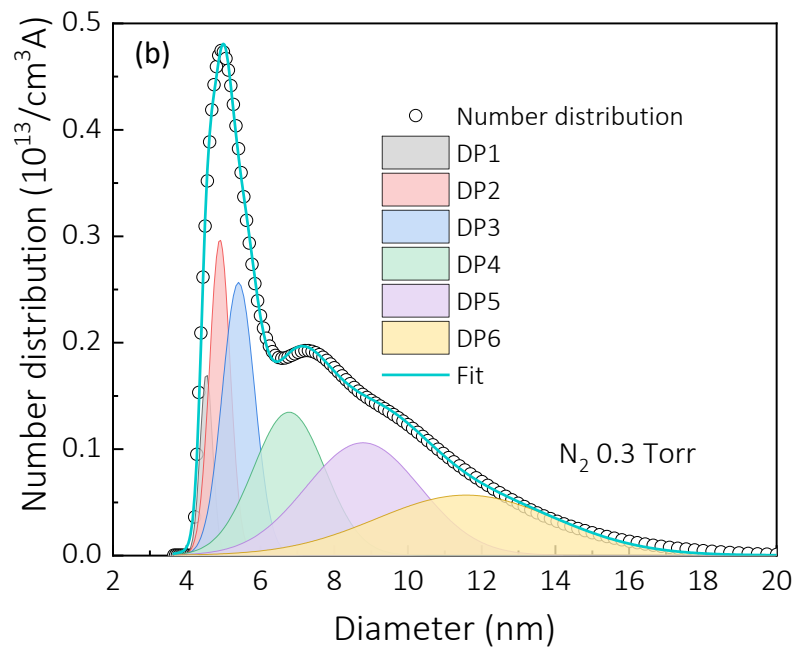

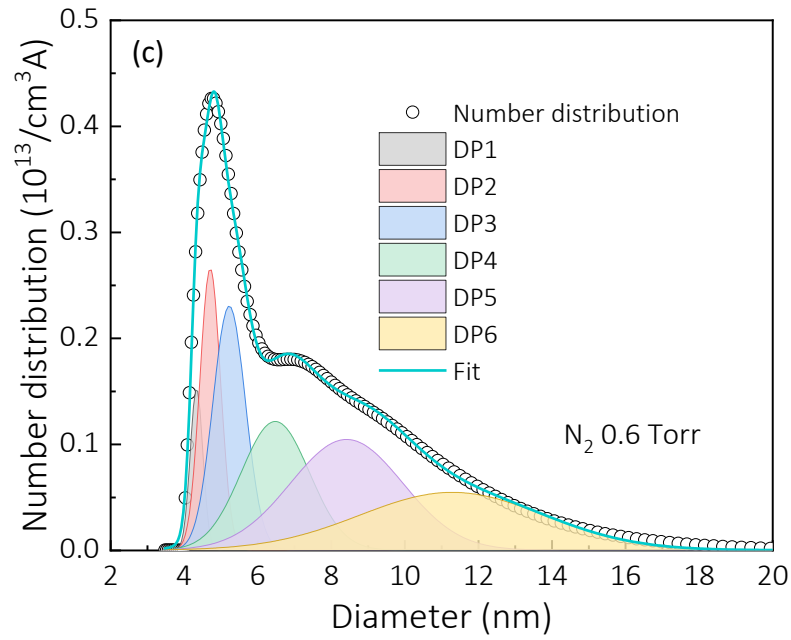

**Fig. S3.** The deconvolution of the number distribution of the treated sample by  $N_2$  plasma. (a) 0.1 Torr, (b) 0.3 Torr, and (c) 0.6 Torr.

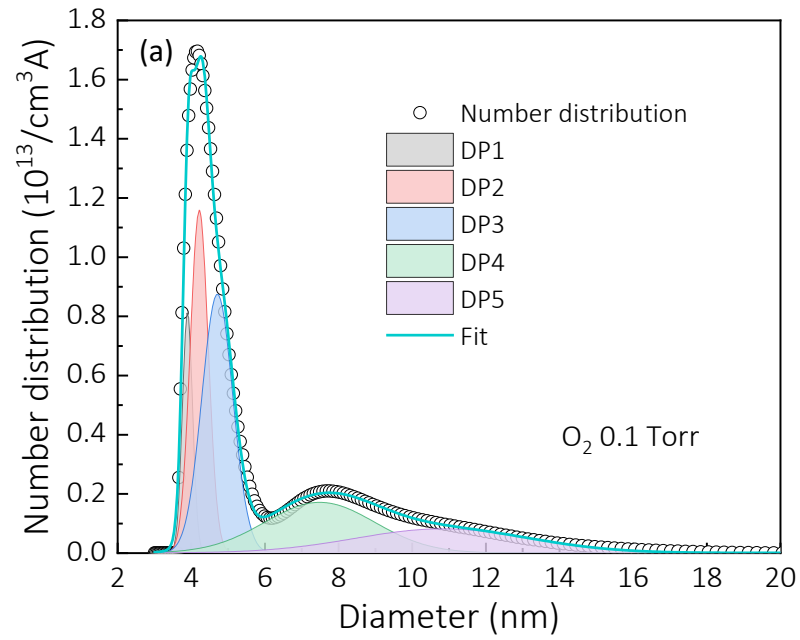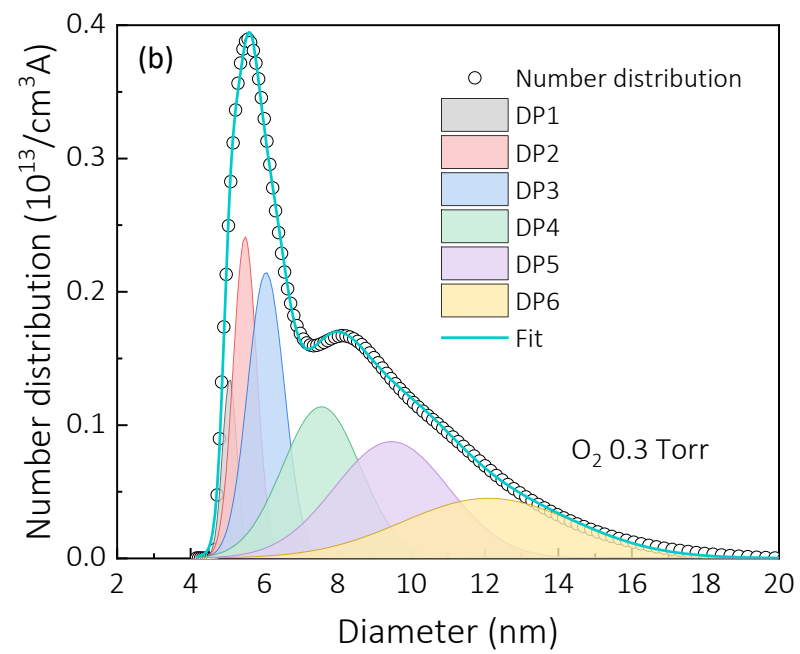

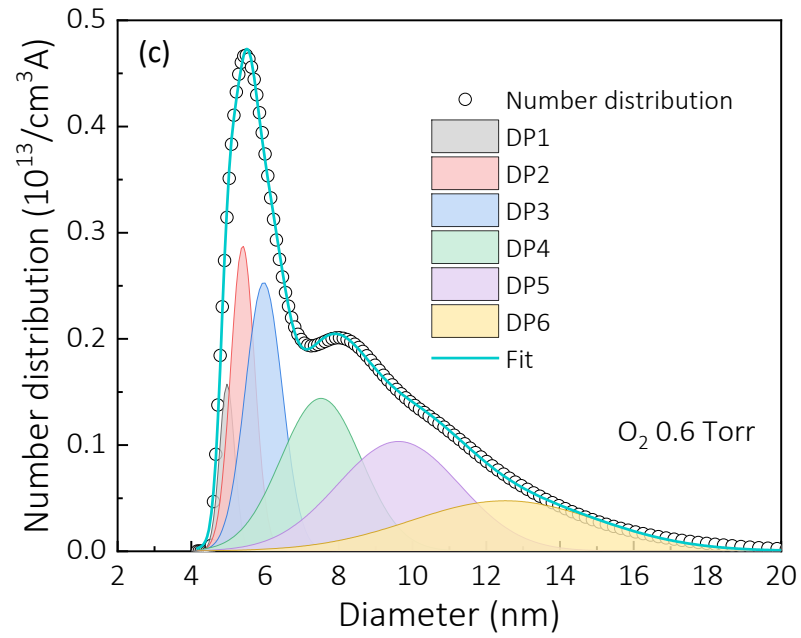

**Fig. S4.** The deconvolution of the number distribution of the treated sample by O<sub>2</sub> plasma. (a) 0.1 Torr, (b) 0.3 Torr, and (c) 0.6 Torr.



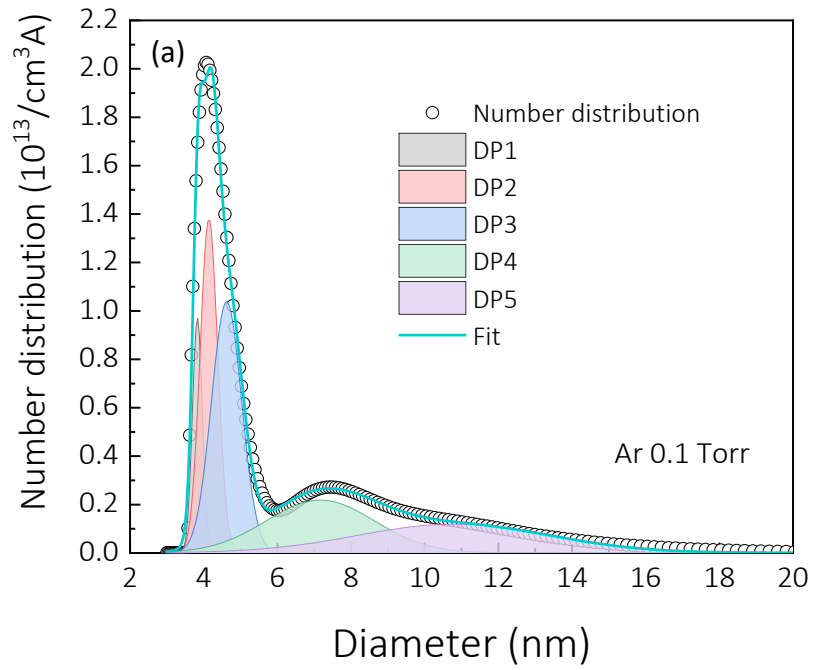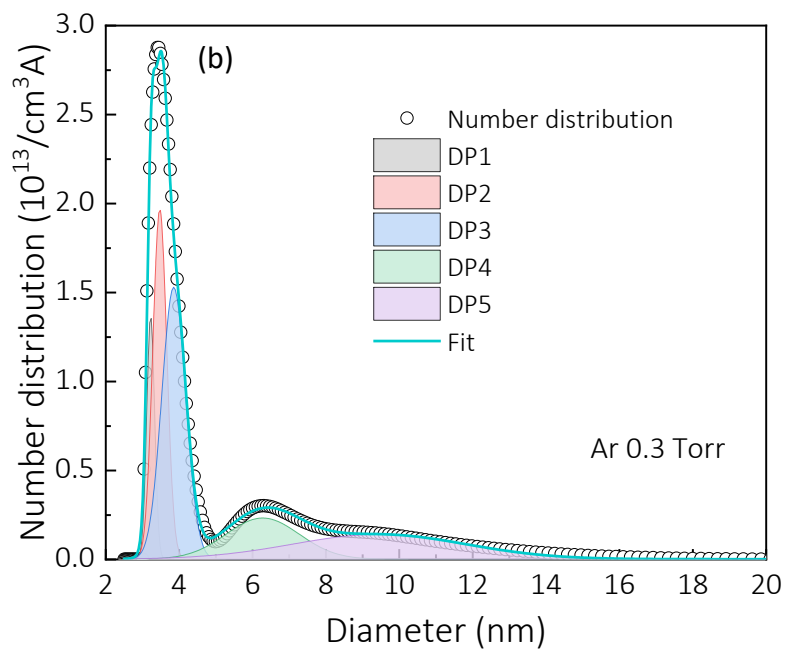

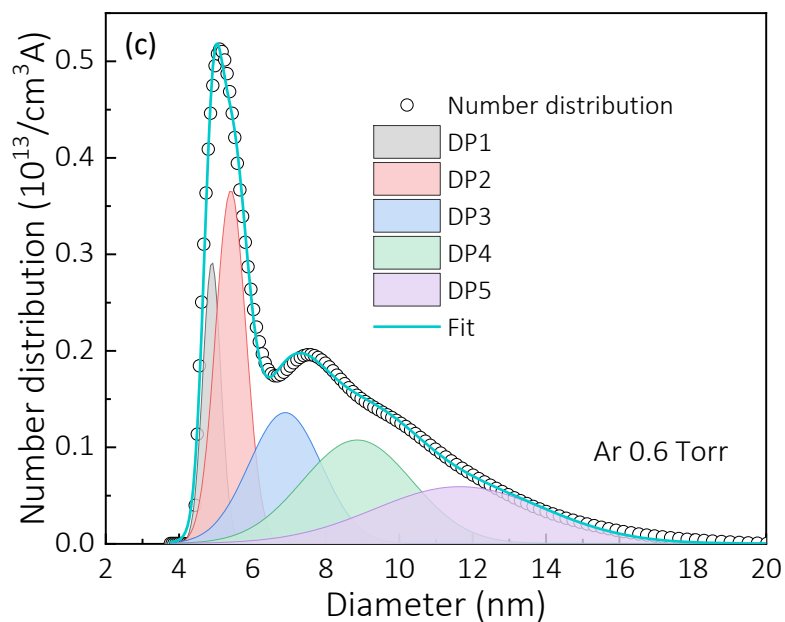

**Fig. S5.** The deconvolution of the number distribution of the treated sample by Ar plasma. (a) 0.1 Torr, (b) 0.3 Torr, and (c) Ar 0.6 Torr.

**Table 2S.** Coefficient of determination ( $R^2$ ) and degree of freedoms (DOFs) related to the deconvolution of the number distributions.

|                | Pristine | N <sub>2</sub> 0.1 | N <sub>2</sub> 0.3 | N <sub>2</sub> 0.6 | O <sub>2</sub> 0.1 | O <sub>2</sub> 0.3 | O <sub>2</sub> 0.6 | Ar 0.1 | Ar 0.3 | Ar 0.6 |
|----------------|----------|--------------------|--------------------|--------------------|--------------------|--------------------|--------------------|--------|--------|--------|
| R <sup>2</sup> | 0.9958   | 0.9963             | 0.9985             | 0.9983             | 0.9965             | 0.9987             | 0.9988             | 0.9964 | 0.9965 | 0.9952 |
| DOF            | 114      | 114                | 144                | 144                | 183                | 140                | 140                | 183    | 155    | 149    |
